# Supplementary material for: Synthesis of silver-loaded ZnO nanorods and their enhanced photocatalytic activity and photoconductivity study
Source: Royal Society of Chemistry journal article supplement (doi:10.1039/c9pp00099b), 2019-03-27
Supplement: c9pp00099b1.pdf [file c9pp00099b1.pdf]

Supporting information

## Synthesis of silver loaded ZnO nanorods and their enhanced photocatalytic activity and photoconductivity study

Prashant V. Pimpliskar,<sup>a</sup> Shrinivas C. Motekar,<sup>b</sup> Govind G. Umarji<sup>a,c</sup>, Wonyoung Lee<sup>c</sup> and Sudhir S. Arbuj,<sup>a,\*</sup>

<sup>a</sup>Centre for Materials for Electronics Technology, Off Pashan Road, Panchvati, Pune-411008, India,  
Tel:+91 20 25899273; Fax: +91 20 25898180, E-mail: sudhir1305@gmail.com / sudhir@cmet.gov.in.

<sup>b</sup>Department of Chemistry, Sunderrao Solanke Mahavidhyalaya, Majalgaon, Beed-431131, Maharashtra, India.

<sup>c</sup>Energy Conversion Lab, School of Mechanical Engineering, Sungkyunkwan University, Suwon-16419, South Korea.

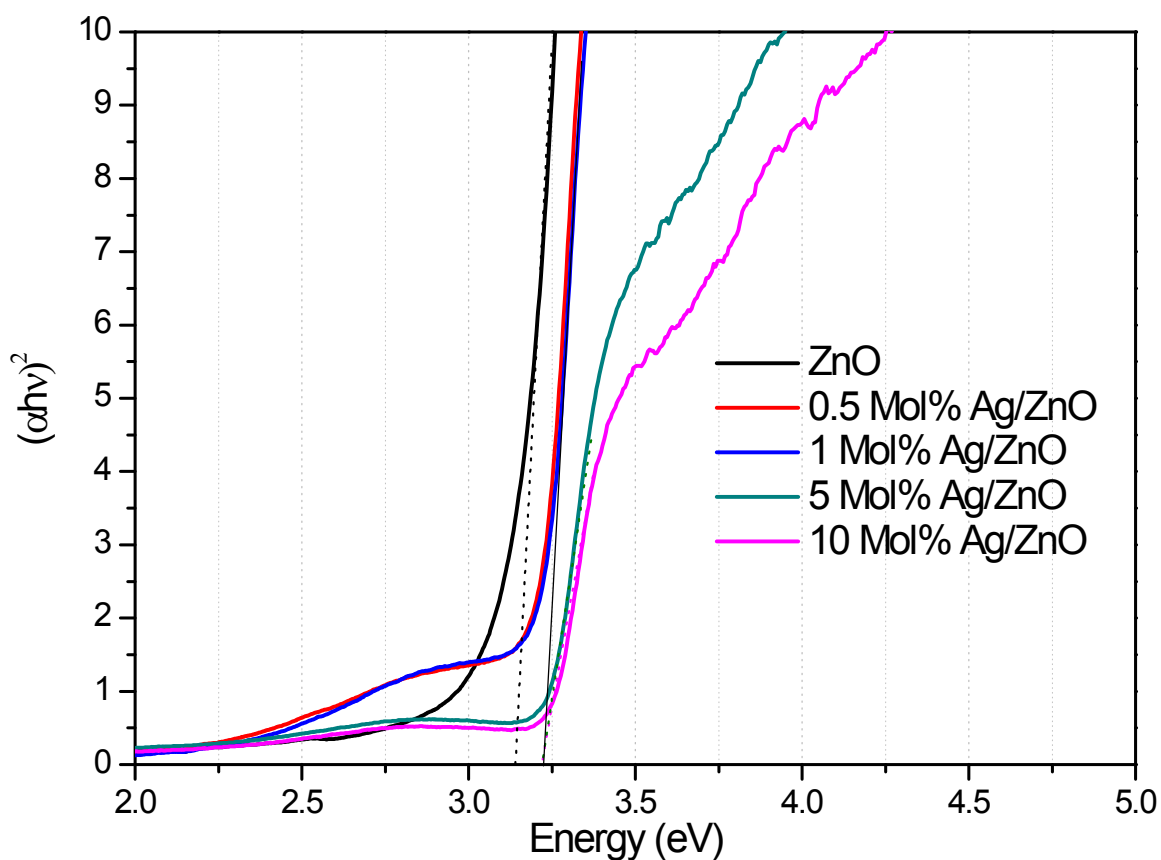

Figure S1: Tauc plot for ZnO and Ag loaded ZnO nanostructures

## Supporting information

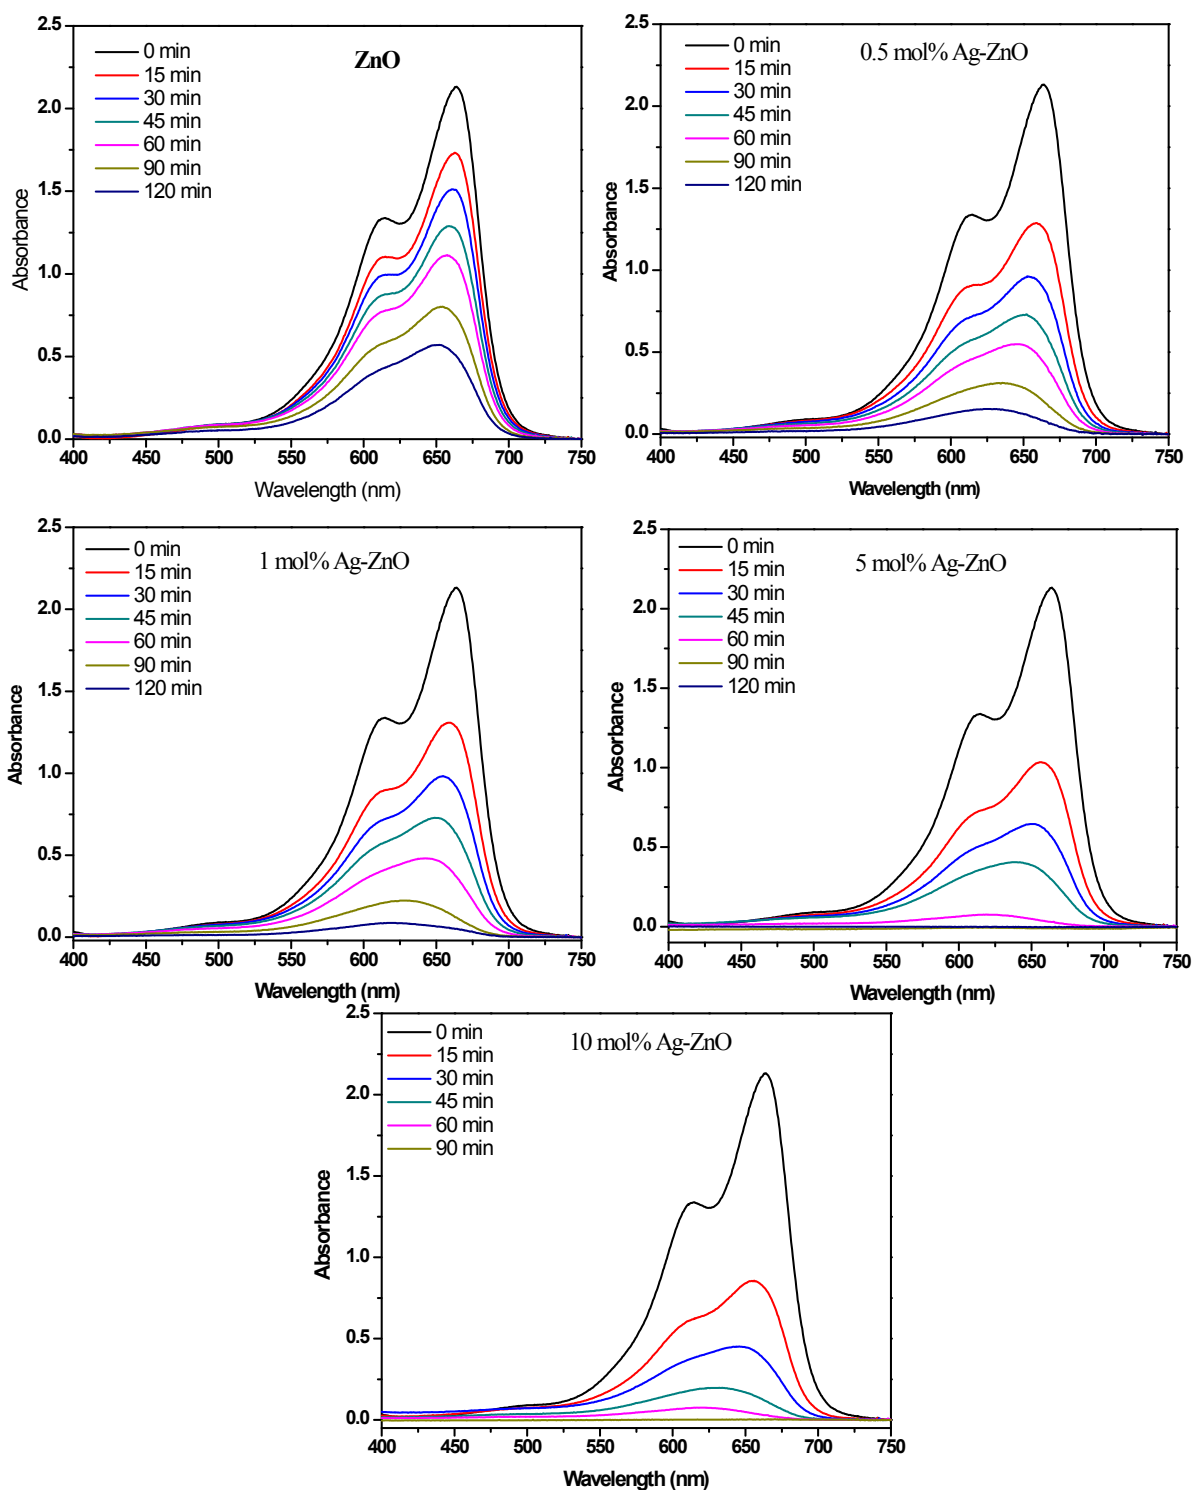

**Fig. S2.** Graph of MB degradation with irradiation time using Ag-ZnO catalyst

The recycle study of the catalyst was performed using 10 mol% Ag-ZnO nanorods for photocatalytic MB degradation under same experimental set up and results are tabulated in Table

### Supporting information

S1. Even after third recycle the catalyst showed 92 % of MB degradation with 1h of irradiation, this clearly confirms the stability and reproducibility of the catalyst.

**Table S1.** Amount of %MB degradation after 1h of irradiation over 10 mol % Ag-ZnO catalyst

| Sr. No. | Description | % MB degrade |
|---------|-------------|--------------|
| 1       | First run   | 96           |
| 2       | Second run  | 94           |
| 3       | Third run   | 92           |

XRD analysis of as synthesized and used catalyst is depicted in Fig. S 2. The Ag-ZnO catalyst recovered after third run was analyzed with X-ray diffractogram. The identical XRD pattern confirms the stability of Ag-ZnO catalyst.

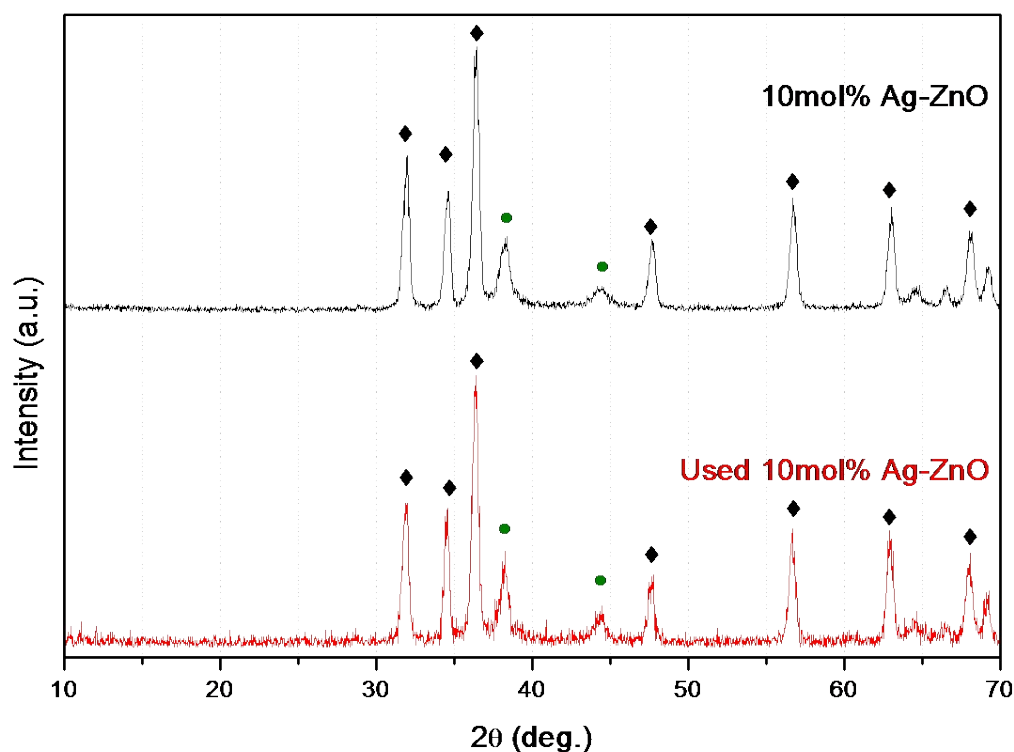

**Fig. S3.** XRD pattern of 10 mol% Ag-ZnO before and after photocatalytic MB degradation reaction
